# Supplementary figures and images for: Hydration dynamics and IR spectroscopy of 4-fluorophenol
Source: Royal Society of Chemistry journal article supplement (doi:10.1039/d2cp02857c), 2022-01-01

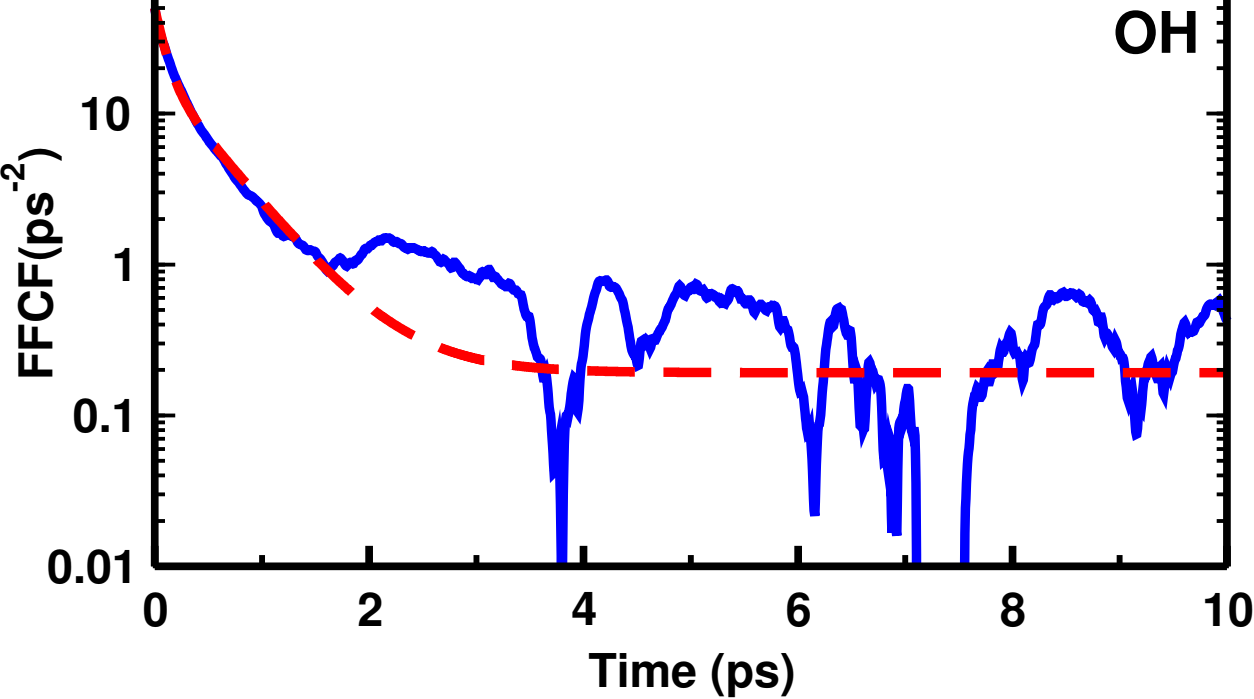

Supplement: d2cp02857c2.pdf [file d2cp02857c2.pdf]

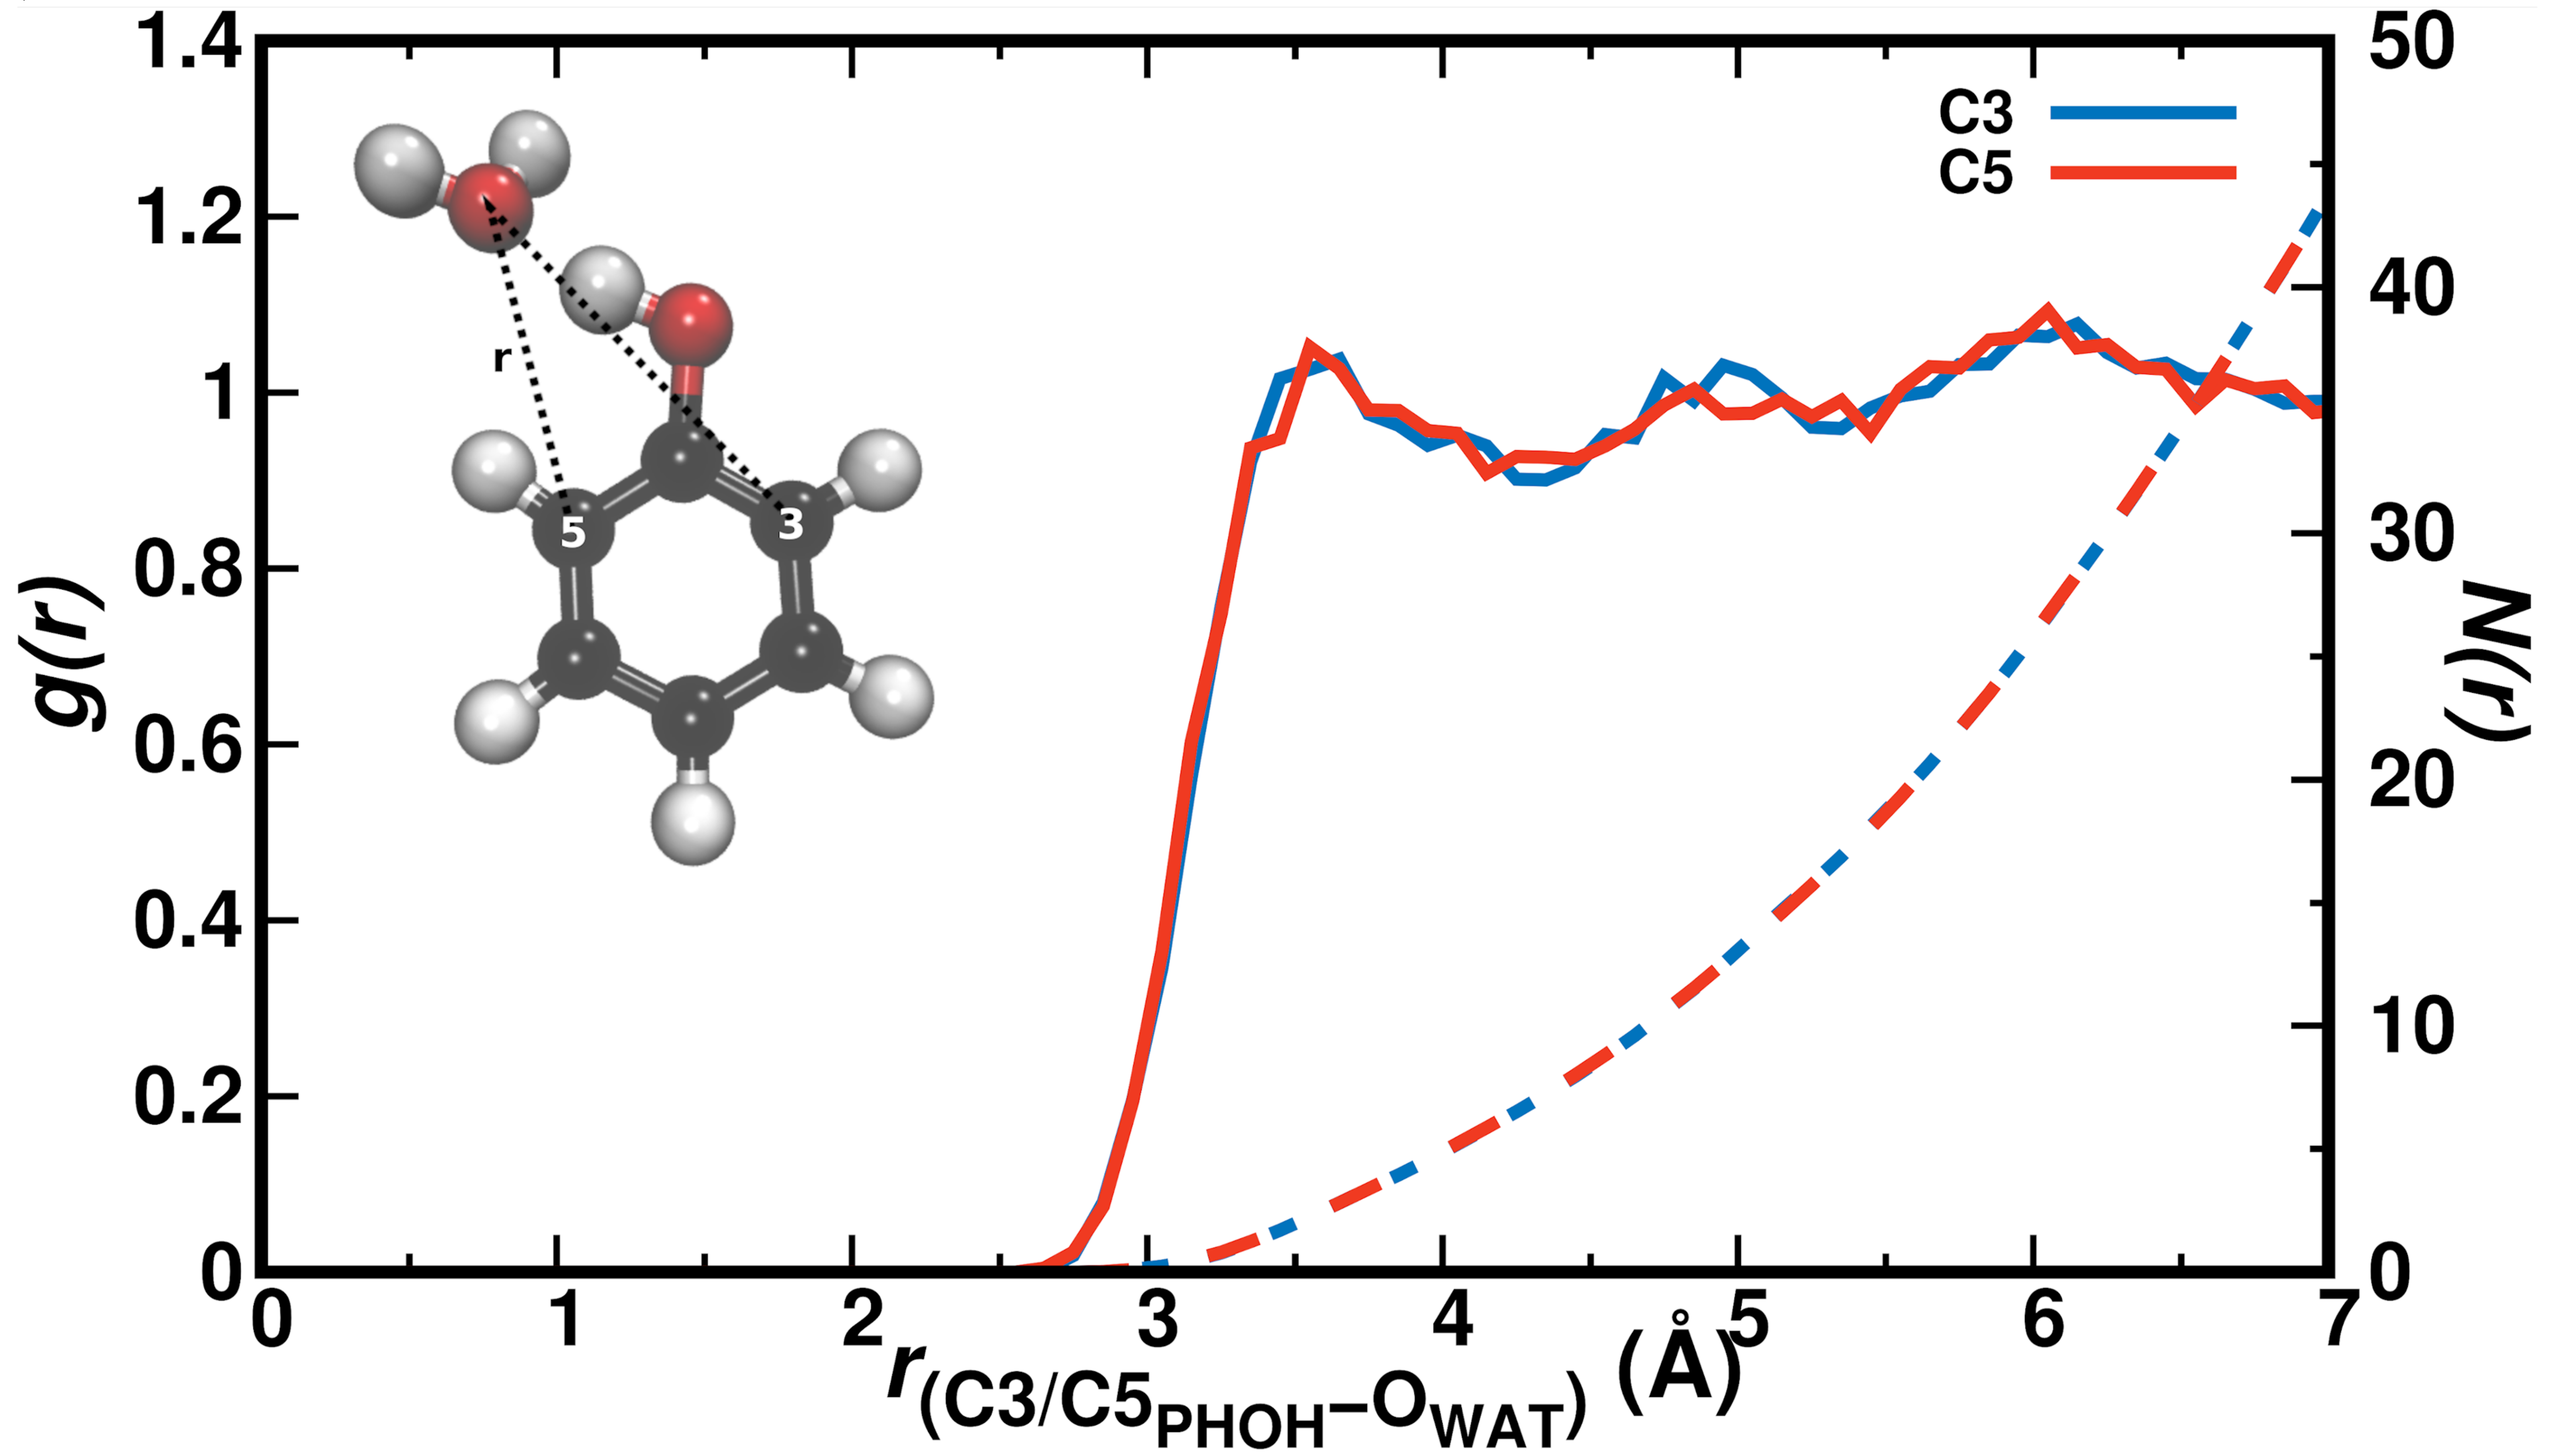

Supplement: d2cp02857c7.pdf [file d2cp02857c7.pdf]

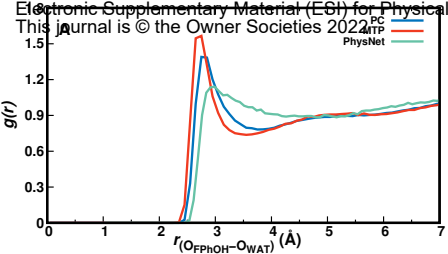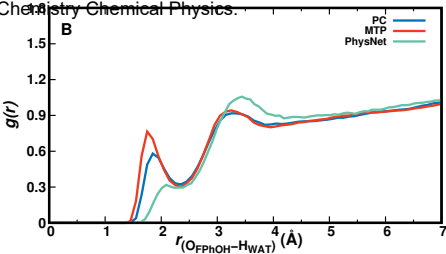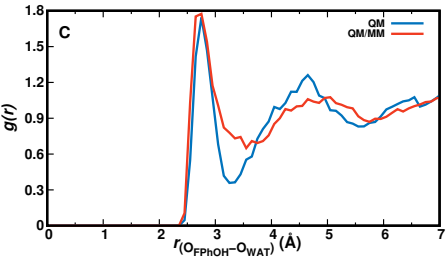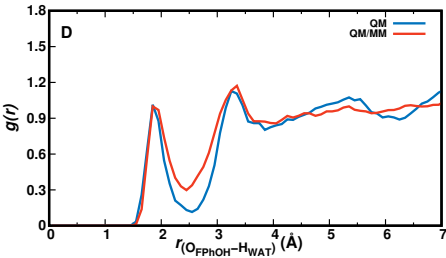

Supplement: d2cp02857c8.pdf [file d2cp02857c8.pdf]
